# Supplementary material
Source: PubMed Central journal article supplement (PMC4938802)

Supplementary Figure 1.

Most probable haplotypes of markers across the BRIP1 region, for carriers of the p.Arg798Arg variant, based on 36 markers genotyped on iCOGS. p.Arg798Ter is marker 15; a list of the markers used is given in Supplementary Table 1. 44 carriers share a common haplotype consisting of 21 markers across a 150kb interval (with the exception of one discrepant genotype for marker 12, rs11871134); for these individuals the shared haplotype is shown. Two carriers do not share the consensus haplotype – for these individuals both haplotypes (at the bottom of the figure) are given. Green indicates allele 1 and red indicates allele 2. Haplotypes from individuals of Asian and African-American ancestry, respectively, are highlighted as green and yellow respectively; the remaining haplotypes are from individuals of European ancestry.

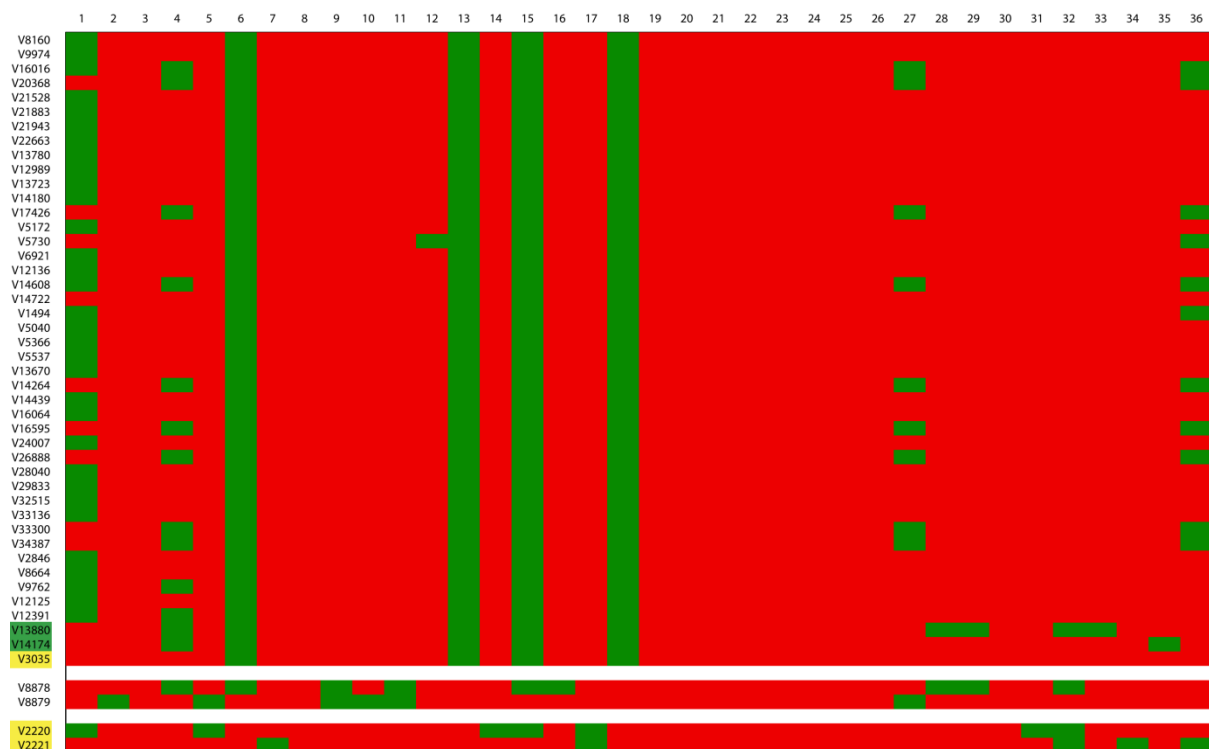

Supplement: NIHMS783860-supplement-Figure.pdf [file NIHMS783860-supplement-Figure.pdf]
