# Supplementary material
Source: PubMed Central journal article supplement (PMC4938802)
Supplement: NIHMS783860-supplement-Tables.pdf [file NIHMS783860-supplement-Tables.pdf]

**Supplementary Table 1.** *BRIP1* variants called in SEARCH

| Exon                | Nucleotide change  | Protein change      | dbSNP ID | CASES<br>(n=13,213) |      | CONTROLS<br>(n=5242) |      | Validated<br>with<br>Sanger? <sup>1</sup> | <i>In silico</i> tools |          |      |
|---------------------|--------------------|---------------------|----------|---------------------|------|----------------------|------|-------------------------------------------|------------------------|----------|------|
|                     |                    |                     |          | Het.                | Hom. | Het.                 | Hom. |                                           | CADD                   | PolyPhen | SIFT |
| Truncating Variants |                    |                     |          |                     |      |                      |      |                                           |                        |          |      |
| 3                   | c.133G>T           | p.Glu45Ter          |          | 0                   | 0    | 1                    | 0    | Y                                         | 37                     | -        | -    |
|                     | c.380-1G>T         |                     |          | 1                   |      | 0                    |      | N/D                                       | 17.99                  | -        | -    |
| 5                   | c.394dupA          | p.Thr132AsnfsTer10  |          | 0                   |      | 1                    |      | Y                                         | 19.7                   | -        | -    |
| 7                   | c.633delT          | p.Gly212AlafsTer62  |          | 1                   |      | 0                    |      | N/D                                       | 16.8                   | -        | -    |
| 7                   | c.890delA          | p.Lys297SerfsTer6   |          | 1                   |      | 0                    |      | Y                                         | 32                     | -        | -    |
| 8                   | c.1056T>G          | p.Tyr352Ter         |          | 1                   | 0    | 0                    | 0    | Y                                         | 39                     | -        | -    |
| 9                   | c.1315C>T          | p.Arg439Ter         |          | 1                   | 0    | 0                    | 0    | Y                                         | 40                     | -        | -    |
| 13                  | c.1871C>A          | p.Ser624Ter         |          | 1                   | 0    | 0                    | 0    | Y                                         | 43                     | -        | -    |
| 13                  | c.1888dupA         | p.Thr630AsnfsTer9   |          | 1                   |      | 1                    |      | Y                                         | 24.7                   | -        | -    |
| 14                  | c.2010dupT         | p.Glu671Ter         |          | 4                   |      | 1                    |      | Y                                         | 29.3                   | -        | -    |
| 14                  | c.2038_2039dupTT   | p.Leu680PhefsTer9   |          | 1                   |      | 0                    |      | N                                         | 16.54                  | -        | -    |
| 14                  | c.2050_2051delTG   | p.Cys684ProfsTer32  |          | 1                   |      | 0                    |      | Y                                         | 23.7                   | -        | -    |
| 19                  | c.2684_2687delCCAT | p.Ser895Ter         |          | 1                   |      | 1                    |      | Y                                         | 35                     | -        | -    |
| 19                  | c.2715dupT         | p.Glu906Ter         |          | 1                   |      | 0                    |      | Y                                         | 16.22                  | -        | -    |
| 19                  | c.2765T>G          | p.Leu922Ter         |          | 1                   | 0    | 0                    | 0    | Y                                         | 37                     | -        | -    |
|                     | c.2906-2A>C        |                     |          | 4                   |      | 2                    |      | N/D                                       | 15.83                  | -        | -    |
| 20                  | c.2990_2993delCAAA | p.Thr997ArgfsTer61  |          | 1                   |      | 0                    |      | N/D                                       | 34                     | -        | -    |
| 20                  | c.2992_2993delAA   | p.Lys998GlufsTer3   |          | 1                   |      | 4                    |      | Y                                         | 38                     | -        | -    |
| 20                  | c.3401delC         | p.Pro1134LeufsTer16 |          | 2                   |      | 1                    |      | N/D                                       | 41                     | -        | -    |
| 20                  | c.3525dupT         | p.Ile1176TyrfsTer13 |          | 1                   |      | 0                    |      | Y                                         | 16.33                  | -        | -    |
| 20                  | c.3651G>A          | p.Trp1217Ter        |          | 0                   | 0    | 1                    | 0    | Y                                         | 38                     | -        | -    |
| In-frame deletion   |                    |                     |          |                     |      |                      |      |                                           |                        |          |      |
| 20                  | c.3374_3376delCAG  | p.Ala1125del        |          | 0                   |      | 2                    |      | N/D                                       | 16.11                  |          |      |

| Missense Variants |           |             |             |     |    |    |   |     |       |                |             |
|-------------------|-----------|-------------|-------------|-----|----|----|---|-----|-------|----------------|-------------|
| 3                 | c.139C>G  | p.Pro47Ala  | rs28903098  | 13  | 0  | 5  | 0 | N/D | 14.21 | prob. damaging | tolerated   |
| 3                 | c.169C>T  | p.Leu57Phe  |             | 1   | 0  | 0  | 0 | N/D | 12.46 | prob. damaging | deleterious |
| 3                 | c.205G>A  | p.Gly69Arg  | rs372581879 | 0   | 0  | 1  | 0 | N/D | 15.08 | benign         | tolerated   |
| 4                 | c.293A>G  | p.Asn98Ser  |             | 0   | 0  | 1  | 0 | N/D | 0.013 | benign         | tolerated   |
| 4                 | c.316C>T  | p.Arg106Cys |             | 1   | 0  | 1  | 0 | N/D | 11.58 | benign         | tolerated   |
| 4                 | c.317G>A  | p.Arg106His | rs143615668 | 1   | 0  | 0  | 0 | N/D | 8.081 | benign         | tolerated   |
| 5                 | c.413T>C  | p.Leu138Ser |             | 1   | 0  | 2  | 0 | Y   | 23.1  | poss. damaging | deleterious |
| 5                 | c.415T>G  | p.Ser139Ala | rs202072866 | 1   | 0  | 0  | 0 | Y   | 23.9  | poss. damaging | tolerated   |
| 5                 | c.430G>A  | p.Ala144Thr | rs116952709 | 3   | 0  | 1  | 0 | N/D | 18.56 | poss. damaging | tolerated   |
| 6                 | c.517C>T  | p.Arg173Cys | rs4988345   | 121 | 22 | 45 | 6 | Y   | 20.8  | Benign         | deleterious |
| 6                 | c.538G>C  | p.Val180Leu |             | 0   | 0  | 1  | 0 | N/D | 11.10 | Benign         | tolerated   |
| 6                 | c.543C>A  | p.His181Gln |             | 1   | 0  | 0  | 0 | N/D | 0.052 | Benign         | tolerated   |
| 6                 | c.550G>T  | p.Asp184Tyr | rs201047375 | 6   | 0  | 2  | 0 | N/D | 12.95 | prob. damaging | deleterious |
| 6                 | c.577G>A  | p.Val193Ile | rs4988346   | 111 | 18 | 42 | 5 | N/D | 0.342 | Benign         | tolerated   |
| 6                 | c.590C>A  | p.Ser197Tyr |             | 0   | 1  | 1  | 0 | N/D | 9.206 | poss. damaging | tolerated   |
| 6                 | c.590C>T  | p.Ser197Phe |             | 0   | 1  | 0  | 0 | N/D | 10.27 | Benign         | tolerated   |
| 7                 | c.668A>G  | p.Gln223Arg |             | 2   | 0  | 0  | 0 | N/D | 10.71 | Benign         | tolerated   |
| 7                 | c.679C>G  | p.Gln227Glu | rs45459799  | 2   | 0  | 1  | 0 | N/D | 0.156 | Benign         | tolerated   |
| 7                 | c.751C>T  | p.Arg251Cys |             | 1   | 0  | 0  | 0 | Y   | 21.6  | prob. damaging | deleterious |
| 7                 | c.764A>G  | p.Gln255Arg |             | 1   | 0  | 0  | 0 | N/D | 19.31 | prob. damaging | deleterious |
| 7                 | c.778A>G  | p.Thr260Ala | rs138743097 | 3   | 0  | 2  | 0 | N/D | 11.43 | benign         | tolerated   |
| 7                 | c.790C>T  | p.Arg264Trp | rs28997569  | 27  | 0  | 19 | 0 | Y   | 16.72 | prob. damaging | deleterious |
| 7                 | c.797C>T  | p.Thr266Met |             | 0   | 0  | 1  | 0 | Y   | 21.4  | prob. damaging | deleterious |
| 7                 | c.841C>A  | p.His281Asn |             | 1   | 0  | 0  | 0 | N/D | 17.64 | poss. damaging | tolerated   |
| 7                 | c.856C>T  | p.Pro286Ser |             | 0   | 0  | 1  | 0 | N/D | 16.49 | prob. damaging | tolerated   |
| 7                 | c.868G>A  | p.Gly290Ser | rs145601931 | 1   | 0  | 0  | 0 | N/D | 5.895 | benign         | tolerated   |
| 7                 | c.888G>C  | p.Glu296Asp |             | 0   | 0  | 1  | 0 | N/D | 11.59 | poss. damaging | tolerated   |
| 7                 | c.890A>G  | p.Lys297Arg | rs28997570  | 49  | 0  | 25 | 0 | N/D | 8.669 | benign         | tolerated   |
| 8                 | c.931T>C  | p.Tyr311His |             | 1   | 0  | 0  | 0 | N/D | 9.222 | benign         | tolerated   |
| 8                 | c.941A>G  | p.His314Arg | rs112076926 | 2   | 0  | 0  | 0 | N/D | 19.09 | prob. damaging | tolerated   |
| 8                 | c.1000G>A | p.Ala334Thr |             | 2   | 0  | 0  | 0 | Y   | 33    | prob. damaging | deleterious |
| 8                 | c.1012G>A | p.Glu338Lys |             | 1   | 0  | 0  | 0 | Y   | 33    | prob. damaging | deleterious |
| 8                 | c.1021G>A | p.Val341Ile |             | 1   | 0  | 0  | 0 | N/D | 19.25 | benign         | deleterious |
| 8                 | c.1045G>C | p.Ala349Pro | rs149364097 | 1   | 0  | 1  | 0 | Y   | 17.53 | poss. damaging | deleterious |

|    |           |             |             |    |   |   |   |     |       |                |             |
|----|-----------|-------------|-------------|----|---|---|---|-----|-------|----------------|-------------|
| 8  | c.1054T>C | p.Tyr352His |             | 1  | 0 | 1 | 0 | Y   | 18.42 | poss. damaging | deleterious |
| 8  | c.1055A>G | p.Tyr352Cys | -           | 1  | 0 | 0 | 0 | Y   | 20.8  | prob. damaging | deleterious |
| 8  | c.1105T>C | p.Tyr369His | -           | 1  | 0 | 0 | 0 | Y   | 23.0  | prob. damaging | deleterious |
| 8  | c.1114C>T | p.Leu372Phe | -           | 2  | 0 | 0 | 0 | Y   | 21.4  | prob. damaging | deleterious |
| 8  | c.1124C>T | p.Ala375Val | -           | 1  | 0 | 0 | 0 | N/D | 19.22 | benign         | deleterious |
| 9  | c.1207C>T | p.Arg403Trp | rs369631413 | 0  | 0 | 1 | 0 | Y   | 19.28 | prob. damaging | deleterious |
| 9  | c.1216G>T | p.Ala406Ser | -           | 1  | 0 | 0 | 0 | N/D | 20.6  | poss. damaging | deleterious |
| 9  | c.1255C>T | p.Arg419Trp | rs150624408 | 4  | 0 | 2 | 0 | Y   | 20.6  | prob. damaging | deleterious |
| 9  | c.1286A>C | p.Asn429Thr | -           | 0  | 0 | 1 | 0 | Y   | 19.17 | prob. damaging | tolerated   |
| 9  | c.1292G>A | p.Arg431Lys | -           | 1  | 0 | 0 | 0 | N/D | 21.5  | poss. damaging | tolerated   |
| 12 | c.1637A>G | p.Asp546Gly | -           | 1  | 0 | 1 | 0 | N/D | 18.40 | benign         | deleterious |
| 12 | c.1652C>T | p.Ala551Val | rs375246789 | 2  | 0 | 0 | 0 | N/D | 23.7  | prob. damaging | tolerated   |
| 12 | c.1655T>C | p.Ile552Thr | rs369340666 | 1  | 0 | 1 | 0 | Y   | 22.5  | poss. damaging | deleterious |
| 12 | c.1660C>G | p.Gln554Glu | -           | 1  | 0 | 0 | 0 | N/D | 16.31 | poss. damaging | deleterious |
| 12 | c.1676C>G | p.Thr559Arg | -           | 1  | 0 | 0 | 0 | N/D | 13.04 | poss. damaging | tolerated   |
| 12 | c.1684A>G | p.Ile562Val | rs45533636  | 0  | 0 | 1 | 0 | N/D | 3.237 | benign         | tolerated   |
| 12 | c.1704T>G | p.Asn568Lys | -           | 2  | 0 | 0 | 0 | N/D | 5.134 | benign         | tolerated   |
| 12 | c.1735C>T | p.Arg579Cys | rs28997571  | 2  | 0 | 1 | 0 | N/D | 19.23 | benign         | deleterious |
| 12 | c.1759C>G | p.His587Asp | -           | 0  | 0 | 2 | 0 | N/D | 13.68 | benign         | tolerated   |
| 12 | c.1771T>A | p.Phe591Ile | -           | 2  | 0 | 0 | 0 | N/D | 26.0  | prob. damaging | tolerated   |
| 13 | c.1796C>T | p.Ala599Val | -           | 1  | 0 | 0 | 0 | N/D | 21.8  | prob. damaging | tolerated   |
| 13 | c.1804G>T | p.Asp602Tyr | -           | 1  | 0 | 0 | 0 | Y   | 22.0  | prob. damaging | deleterious |
| 13 | c.1871C>T | p.Ser624Leu |             | 1  | 0 | 0 | 0 | Y   | 32    | prob. damaging | deleterious |
| 13 | c.1899C>G | p.Ile633Met | rs28997572  | 3  | 0 | 1 | 0 | Y   | 15.89 | prob. damaging | deleterious |
| 14 | c.1964C>G | p.Pro655Arg | -           | 2  | 0 | 0 | 0 | Y   | 26.6  | prob. damaging | deleterious |
| 14 | c.2071A>C | p.Ile691Leu | -           | 1  | 0 | 0 | 0 | N/D | 14.59 | poss. damaging | deleterious |
| 14 | c.2087C>T | p.Pro696Leu | rs147755155 | 6  | 0 | 0 | 0 | N/D | 15.37 | prob. damaging | deleterious |
| 15 | c.2167G>A | p.Val723Ile | rs145616741 | 1  | 0 | 0 | 0 | N/D | 14.99 | prob. damaging | tolerated   |
| 15 | c.2172T>G | p.Ile724Met | -           | 1  | 0 | 0 | 0 | N/D | 11.67 | prob. damaging | tolerated   |
| 15 | c.2220G>T | p.Gln740His | rs45589637  | 20 | 0 | 6 | 0 | N/D | 10.44 | poss. damaging | deleterious |
| 15 | c.2221G>T | p.Val741Leu | -           | 1  | 0 | 1 | 0 | N/D | 11.22 | benign         | tolerated   |
| 15 | c.2233G>A | p.Ala745Thr |             | 2  | 0 | 0 | 0 | N/D | 15.00 | prob. damaging | tolerated   |
| 15 | c.2236A>G | p.Ile746Val | rs111536363 | 2  | 0 | 0 | 0 | N/D | 11.46 | benign         | tolerated   |
| 16 | c.2285G>A | p.Arg762His | rs200960251 | 1  | 0 | 0 | 0 | N/D | 15.93 | prob. damaging | deleterious |
| 16 | c.2330G>A | p.Arg777His |             | 2  | 0 | 0 | 0 | N/D | 16.54 | prob. damaging | deleterious |

|    |           |              |             |      |      |      |      |     |       |                |             |
|----|-----------|--------------|-------------|------|------|------|------|-----|-------|----------------|-------------|
| 16 | c.2344A>G | p.Ile782Val  | rs142806416 | 3    | 0    | 1    | 0    | N/D | 11.36 | benign         | tolerated   |
| 17 | c.2440C>T | p.Arg814Cys  | rs201869624 | 1    | 0    | 0    | 0    | Y   | 19.51 | prob. damaging | deleterious |
| 17 | c.2441G>A | p.Arg814His  | rs45468199  | 2    | 0    | 0    | 0    | N/D | 15.43 | benign         | tolerated   |
| 18 | c.2542C>T | p.Arg848Cys  | rs45572934  | 0    | 0    | 1    | 0    | Y   | 23.6  | prob. damaging | deleterious |
| 18 | c.2561G>A | p.Ser854Asn  | -           | 1    | 0    | 0    | 0    | N/D | 1.534 | benign         | tolerated   |
| 18 | c.2564G>A | p.Arg855His  | rs200894063 | 1    | 0    | 0    | 0    | Y   | 19.48 | poss. damaging | deleterious |
| 19 | c.2623G>C | p.Glu875Gln  | -           | 0    | 0    | 1    | 0    | N/D | 12.82 | poss. damaging | tolerated   |
| 19 | c.2666A>G | p.Gln889Arg  | -           | 1    | 0    | 0    | 0    | N/D | 10.85 | benign         | tolerated   |
| 19 | c.2717A>G | p.Glu906Gly  | -           | 0    | 0    | 1    | 0    | N/D | 5.913 | benign         | tolerated   |
| 19 | c.2723C>T | p.Thr908Ile  | -           | 1    | 0    | 0    | 0    | N/D | 1.648 | benign         | tolerated   |
| 19 | c.2755T>C | p.Ser919Pro  | rs4986764   | 6348 | 4816 | 2474 | 1942 | N/D | 4.321 | benign         | tolerated   |
| 19 | c.2863A>C | p.Asn955His  | -           | 1    | 0    | 0    | 0    | N/D | 7.268 | benign         | tolerated   |
| 20 | c.2935A>G | p.Lys979Glu  | -           | 3    | 0    | 0    | 0    | N/D | 6.269 | benign         | tolerated   |
| 20 | c.2948T>A | p.Ile983Asn  | -           | 0    | 0    | 1    | 0    | N/D | 8.314 | benign         | tolerated   |
| 20 | c.3050C>T | p.Pro1017Leu | -           | 3    | 0    | 2    | 0    | N/D | 0.119 | benign         | tolerated   |
| 20 | c.3064G>A | p.Glu1022Lys | -           | 4    | 0    | 7    | 0    | N/D | 1.051 | benign         | tolerated   |
| 20 | c.3103C>T | p.Arg1035Cys | rs45437094  | 1    | 0    | 0    | 0    | N/D | 7.694 | benign         | deleterious |
| 20 | c.3178G>A | p.Val1060Ile | rs149016505 | 1    | 0    | 0    | 0    | N/D | 6.966 | benign         | tolerated   |
| 20 | c.3236T>C | p.Ile1079Thr | rs150813402 | 1    | 0    | 0    | 0    | N/D | 3.250 | benign         | tolerated   |
| 20 | c.3275C>T | p.Pro1092Leu | -           | 1    | 0    | 0    | 0    | N/D | 0.003 | benign         | tolerated   |
| 20 | c.3290A>C | p.Glu1097Ala | -           | 1    | 0    | 1    | 0    | N/D | 10.58 | benign         | deleterious |
| 20 | c.3378A>C | p.Glu1126Asp | rs145855459 | 3    | 0    | 0    | 0    | Y   | 13.91 | benign         | tolerated   |
| 20 | c.3444C>A | p.Asp1148Glu | rs28997573  | 7    | 0    | 10   | 0    | Y   | 0.005 | benign         | tolerated   |
| 20 | c.3448G>C | p.Ala1150Pro | -           | 1    | 0    | 0    | 0    | N/D | 5.508 | benign         | tolerated   |
| 20 | c.3487G>A | p.Asp1163Asn | -           | 1    | 0    | 0    | 0    | Y   | 0.021 | benign         | tolerated   |
| 20 | c.3493A>C | p.Ile1165Leu | -           | 1    | 0    | 0    | 0    | N/D | 3.169 | benign         | tolerated   |
| 20 | c.3507C>A | p.Asp1169Glu | rs375741316 | 2    | 0    | 0    | 0    | N/D | 5.323 | benign         | tolerated   |
| 20 | c.3571A>G | p.Ile1191Val | -           | 1    | 0    | 0    | 0    | N/D | 0.234 | benign         | tolerated   |
| 20 | c.3621T>A | p.Asp1207Glu | -           | 1    | 0    | 0    | 0    | N/D | 8.997 | benign         | tolerated   |

<sup>1</sup>N/D = no validation attempted.

**Supplementary Table 2.** *BRIP1* variants called in BCFR

| Exon                | Nucleotide change             | Protein change                 | dbSNP ID    | CASES (n=1,313) | CONTROLS (n=1,123) | Validated with Sanger? | CADD  | PolyPhen       | SIFT        |
|---------------------|-------------------------------|--------------------------------|-------------|-----------------|--------------------|------------------------|-------|----------------|-------------|
| Truncating Variants |                               |                                |             |                 |                    |                        |       |                |             |
| 14                  | c.2008insT                    | p.Glu671Ter                    | -           | 0               | 1                  | Yes                    | 32    |                |             |
| 15                  | c.2108delAinsTCC              | p.Lys703fs                     |             | 1               | 0                  | Yes                    | 16.77 |                |             |
| 17                  | c.2392C>T                     | <b>p.Arg798Ter</b>             | rs137852986 | 2               | 1                  | Yes                    | 39    |                |             |
| 20                  | c.2992del4,<br>c.2992_2995del | p.Lys998fs<br>(Lys998Glufs*60) |             | 1               | 0                  | Yes                    | 36    |                |             |
| Missense Variants   |                               |                                |             |                 |                    |                        |       |                |             |
| 2                   | c.10A>G                       | p.Met4Val                      | rs45512093  | 1               | 0                  | Yes                    | 1.235 | benign         | tolerated   |
| 3                   | c.139C>G                      | p.Pro47Ala                     | rs28903098  | 0               | 4                  | Yes                    | 14.21 | prob. damaging | deleterious |
| 4                   | c.254C>T                      | p.Ser85Leu                     |             | 1               | 0                  | Yes                    | 13.95 | poss. damaging | tolerated   |
| 4                   | c.316C>A                      | p.Ar106Ser                     |             | 0               | 1                  | Yes                    | 5.990 | benign         | tolerated   |
| 5                   | c.430G>A                      | p.Ala144Thr                    |             | 8               | 1                  |                        | 18.56 | prob. damaging | tolerated   |
| 6                   | c.587A>G                      | p.Asn196Ser                    |             | 3               | 1                  | Yes                    | 0.036 | benign         | tolerated   |
| 6                   | c.590C>T                      | p.Ser197Phe                    |             | 1               | 0                  | Yes                    | 10.27 | prob. damaging | tolerated   |
| 7                   | c.689C>T                      | p.Ser230Leu                    |             | 0               | 1                  | Yes                    | 3.213 | benign         | tolerated   |
| 7                   | c.790C>T                      | p.Arg264Trp                    | rs28997569  | 0               | 1                  | Yes                    | 16.72 | prob. damaging | deleterious |
| 7                   | c.890A>G                      | p.Lys297Arg                    | rs28997570  | 3               | 9                  | Yes                    | 8.669 | poss. damaging | tolerated   |
| 8                   | c.975A>T                      | p.Leu325Phe                    |             | 0               | 1                  | Yes                    | 12.60 | benign         | deleterious |
| 10                  | c.1376G>C                     | p.Arg459Thr                    |             | 0               | 1                  | Yes                    | 14.03 | benign         | tolerated   |
| 11                  | c.1499A>G                     | p.Lys500Arg                    |             | 1               | 0                  | Yes                    | 14.65 | prob. damaging | tolerated   |
| 12                  | c.1735C>T                     | p.Arg579Cys                    | rs28997571  | 0               | 1                  | Yes                    | 19.23 | benign         | tolerated   |
| 15                  | c.2220G>T                     | p.Gln740His                    | rs45589637  | 0               | 2                  | Yes                    | 10.44 | prob. damaging | tolerated   |
| 15                  | c.2236A>G                     | p.Ile746Val                    | rs111536363 | 1               | 1                  | Yes                    | 11.46 | benign         | tolerated   |

|    |           |              |             |   |   |     |       |                |             |
|----|-----------|--------------|-------------|---|---|-----|-------|----------------|-------------|
| 15 | c.2254A>C | p.Lys752Gln  |             | 1 | 0 | Yes | 12.04 | prob. damaging | tolerated   |
| 16 | c.2344A>G | p.Ile782Val  | rs142806416 | 1 | 0 | Yes | 11.36 | benign         | tolerated   |
| 19 | c.2594G>A | p.Arg865Gln  | -           | 0 | 1 | Yes | 28.5  | prob. damaging | deleterious |
| 19 | c.2830C>G | p.Gln944Glu  | rs140233356 | 1 | 0 | Yes | 9.684 | poss. damaging | tolerated   |
| 20 | c.2915T>G | p.Val972Gly  | -           | 1 | 0 | Yes | 3.520 | benign         | tolerated   |
| 20 | c.2948T>A | p.Ile983Asn  | -           | 1 | 0 | Yes | 8.314 | benign         | tolerated   |
| 20 | c.3038C>T | p.Thr1013Ile | -           | 0 | 1 | Yes | 10.14 | poss. damaging | tolerated   |
| 20 | c.3392A>C | p.Tyr1131Ser | -           | 0 | 1 | Yes | 13.23 | prob. damaging | tolerated   |
| 20 | c.3464G>A | p.Gly1155Glu | rs45603843  | 1 | 0 | Yes | 0.052 | benign         | tolerated   |
| 20 | c.3559G>A | p.Ala1187Thr | rs367610893 | 1 | 0 | Yes | 7.277 | benign         | tolerated   |

**Supplementary Table 3.** *BRIP1* variants called in the PeterMac Study

| Exon                | Nucleotide change  | Protein change     | dbSNP ID    | CASES (n=1853) | CONTROLS (n=2001) | Validated with Sanger? | CADD  | PolyPhen       | SIFT        |
|---------------------|--------------------|--------------------|-------------|----------------|-------------------|------------------------|-------|----------------|-------------|
| Truncating Variants |                    |                    |             |                |                   |                        |       |                |             |
|                     | c.1850A>T          | p.Leu617Ter        |             | 0              | 1                 | yes                    | 43    |                |             |
| 13                  | c.1871C>A          | p.Ser624Ter        |             | 1              | 0                 | yes                    | 43    |                |             |
| 17                  | c.2392C>T          | <b>p.Arg798Ter</b> | rs137852986 | 4              | 0                 | yes                    | 39    |                |             |
| 20                  | c.2990_2993delCAAA | p.Thr997ArgfsTer61 |             | 0              | 2                 | yes                    | 34    |                |             |
| 20                  | c.2992_2993delAA   | p.Lys998GlufsTer3  |             | 1              | 1                 | yes                    | 38    |                |             |
| Missense Variants   |                    |                    |             |                |                   |                        |       |                |             |
| 3                   | c.139C>G           | p.Pro47Ala         | rs28903098  | 2              | 0                 | N/A                    | 14.21 | prob. damaging | deleterious |
| 4                   | c.347C>G           | p.Ser116Cys        | .           | 0              | 1                 | yes                    | 15.54 | prob. damaging | deleterious |
| 5                   | c.430G>A           | p.Ala144Thr        | rs116952709 | 2              | 0                 | N/A                    | 18.56 | prob. damaging | tolerated   |
| 6                   | c.517C>T           | p.Arg173Cys        | rs4988345   | 33             | 26                | N/A                    | 20.80 | prob. damaging | deleterious |
| 6                   | c.550G>T           | p.Asp184Tyr        | rs201047375 | 1              | 0                 | N/A                    | 12.95 | prob. damaging | deleterious |
| 7                   | c.790C>T           | p.Arg264Trp        | rs28997569  | 2              | 4                 | N/A                    | 16.72 | prob. damaging | deleterious |
| 8                   | c.1000G>T          | p.Ala334Ser        | .           | 1              | 0                 | yes                    | 20.90 | benign         | deleterious |
| 8                   | c.1105T>C          | p.Tyr369His        | .           | 0              | 1                 | yes                    | 23.00 | prob. damaging | deleterious |
| 9                   | c.1168G>A          | p.Val390Ile        | .           | 0              | 1                 | yes                    | 12.02 | benign         | tolerated   |
| 9                   | c.1255C>T          | p.Arg419Trp        | rs150624408 | 2              | 0                 | N/A                    | 20.60 | prob. damaging | deleterious |
| 9                   | c.1286A>C          | p.Asn429Thr        | .           | 0              | 1                 | yes                    | 19.17 | prob. damaging | tolerated   |
| 10                  | c.1433A>G          | p.His478Arg        | rs45501097  | 1              | 0                 | yes                    | 11.00 | benign         | tolerated   |
| 10                  | c.1441G>T          | p.Gly481Cys        | .           | 1              | 0                 | yes                    | 19.52 | prob. damaging | deleterious |
| 10                  | c.1444A>G          | p.Ile482Val        | rs142744352 | 0              | 1                 | N/A                    | 17.96 | prob. damaging | tolerated   |
| 11                  | c.1610T>A          | p.Leu537His        | .           | 1              | 0                 | yes                    | 20.50 | prob. damaging | deleterious |
| 13                  | c.1798T>C          | p.Phe600Leu        | .           | 0              | 1                 | yes                    | 24.70 | prob. damaging | deleterious |
| 14                  | c.2056A>G          | p.Thr686Ala        | .           | 1              | 0                 | yes                    | 12.95 | benign         | tolerated   |
| 14                  | c.2087C>T          | p.Pro696Leu        | rs147755155 | 0              | 1                 | N/A                    | 15.37 | prob. damaging | deleterious |
| 15                  | c.2220G>T          | p.Gln740His        | rs45589637  | 2              | 3                 | N/A                    | 10.44 | poss. damaging | deleterious |
| 16                  | c.2330G>A          | p.Arg777His        | .           | 1              | 0                 | yes                    | 16.54 | prob. damaging | deleterious |
| 17                  | c.2390A>G          | p.Lys797Arg        | .           | 1              | 0                 | yes                    | 19.53 | prob. damaging | deleterious |
| 17                  | c.2411A>G          | p.His804Arg        | .           | 1              | 0                 | yes                    | 20.80 | prob. damaging | tolerated   |

|    |           |              |             |   |   |     |       |                |             |
|----|-----------|--------------|-------------|---|---|-----|-------|----------------|-------------|
| 17 | c.2440C>T | p.Arg814Cys  | rs201869624 | 1 | 1 | yes | 19.51 | prob. damaging | deleterious |
| 17 | c.2467A>G | p.Arg823Gly  | .           | 1 | 0 | yes | 20.80 | prob. damaging | deleterious |
| 19 | c.2582C>G | p.Ser861Cys  | .           | 1 | 0 | N/A | 21.50 | prob. damaging | deleterious |
| 20 | c.3371A>G | p.Glu1124Gly | .           | 1 | 0 | N/A | 15.13 | benign         | deleterious |
| 21 | c.3505G>T | p.Asp1169Tyr | .           | 1 | 0 | yes | 11.40 | poss. damaging | deleterious |

N/A – not applicable because no validation done for known variants



**Supplementary Table 4.** Variants across the *BRIP1* region used to define haplotypes.

| Marker    | Name               | Position        | Minor Allele Frequency | Allele1  | Allele2  |
|-----------|--------------------|-----------------|------------------------|----------|----------|
| 1         | rs2188728          | 59676854        | 0.423                  | C        | A        |
| 2         | rs1974491          | 59724501        | 0.350                  | A        | G        |
| 3         | rs7222964          | 59726936        | 0.117                  | A        | G        |
| 4         | rs1858990          | 59735821        | 0.164                  | C        | A        |
| 5         | rs2106664          | 59736794        | 0.468                  | A        | G        |
| 6         | rs7219555          | 59740122        | 0.293                  | A        | C        |
| 7         | rs12603617         | 59745599        | 0.241                  | G        | A        |
| 8         | rs17533380         | 59746759        | 0.239                  | G        | A        |
| 9         | rs4986764          | 59763347        | 0.420                  | G        | A        |
| 10        | rs4986765          | 59763465        | 0.343                  | G        | A        |
| 11        | rs6504063          | 59767501        | 0.421                  | A        | G        |
| 12        | rs11871134         | 59775949        | 0.034                  | A        | G        |
| 13        | rs7214703          | 59785060        | 0.340                  | G        | A        |
| 14        | rs9901948          | 59793232        | 0.0001                 | A        | G        |
| <b>15</b> | <b>p.Arg798Ter</b> | <b>59793412</b> | <b>0.0002</b>          | <b>G</b> | <b>A</b> |
| 16        | rs16945572         | 59800001        | 0.079                  | A        | G        |
| 17        | rs6504066          | 59802506        | 0.239                  | A        | G        |
| 18        | rs2159451          | 59812748        | 0.338                  | G        | A        |
| 19        | rs11652980         | 59817082        | 0.050                  | G        | C        |
| 20        | rs2159450          | 59826625        | 0.247                  | A        | C        |
| 21        | rs2109255          | 59826765        | 0.247                  | A        | G        |
| 22        | rs2191247          | 59828023        | 0.248                  | A        | C        |
| 23        | rs2191249          | 59835864        | 0.247                  | C        | A        |
| 24        | rs9902995          | 59841185        | 0.247                  | A        | G        |
| 25        | rs7212172          | 59869081        | 0.246                  | A        | G        |
| 26        | rs1468577          | 59870617        | 0.248                  | G        | A        |
| 27        | rs2191248          | 59876352        | 0.348                  | G        | A        |
| 28        | rs16945638         | 59886310        | 0.078                  | A        | G        |

|    |            |          |       |   |   |
|----|------------|----------|-------|---|---|
| 29 | rs16945643 | 59893990 | 0.078 | A | G |
| 30 | rs7215784  | 59894708 | 0.242 | G | A |
| 31 | rs12453935 | 59897455 | 0.197 | G | A |
| 32 | rs6504074  | 59899790 | 0.261 | C | A |
| 33 | rs16945665 | 59911493 | 0.038 | G | A |
| 34 | rs7222876  | 59911541 | 0.001 | G | A |
| 35 | rs2378908  | 59911765 | 0.138 | G | A |
| 36 | rs7223243  | 59911799 | 0.430 | G | A |

**Supplementary Table 5. Published studies of *BRIP1* mutation screening in breast/ovarian cancer families**

| Authors/Title                                                | Source country / Ethnicity | Study design                                                                                                                             | Mutation detection method   | Selection of cases                                                  | Number of cases screened for <i>BRIP1</i> mutations                                          | Number of heterozygous cases | Number of controls screened for <i>BRIP1</i> mutations | Number of heterozygous controls | Comment                                                                                         |
|--------------------------------------------------------------|----------------------------|------------------------------------------------------------------------------------------------------------------------------------------|-----------------------------|---------------------------------------------------------------------|----------------------------------------------------------------------------------------------|------------------------------|--------------------------------------------------------|---------------------------------|-------------------------------------------------------------------------------------------------|
| Rutter et al Hum Mutat. 2003 Aug;22(2):121-8.                | USA                        | Candidate gene approach                                                                                                                  | DHPLC and Sanger sequencing | HBOC families + early onset BC cases (<35 y.o)                      | 79                                                                                           | 8                            | 30                                                     | 4                               |                                                                                                 |
| Lewis et al Breast Cancer Res. 2005;7(6):R1005-16.           | Australian                 | Candidate gene approach; mutation screening of familial BC cases and genotyping of 2 specific missense p.P47A and p.M299I.               | DHPLC and Sanger sequencing | Multiple-case BC families (KConFab)                                 | 75 families screened for entire coding sequence + 253 index cases screened for exons 3 and 7 | 1 frameshift, 4 missense     | (genotyped only for variants found in cases)           | 1 missense                      |                                                                                                 |
| Vahteristo et al BMC Cancer. 2006 Jan 24;6:19.               | Finnish                    | Candidate gene approach; mutation screening of familial BC cases and genotyping of 2 specific missense p.Val93Ile and the SNP ser919Pro. | CSGE                        | BC families negative for <i>BRCA1/2</i>                             | 43                                                                                           | 1 rare missense (Val93Ile)   | 183 (only genotyped for p.Val93Ile)                    | 0                               | p.Val93Ile identified in 1 family then genotyped in 346 additional BC cases and in 183 controls |
| Seal et al Nat Genet. 2006 Nov;38(11):1239-41.               | UK                         | Candidate gene approach with focus on LOF variants; case-control mutation screening study                                                | CSGE                        | HBOC families                                                       | 1,212                                                                                        | 9                            | 2,081                                                  | 2                               | RR 2.0 (95%CI 1.2-3.2)                                                                          |
| Guénard et al . J Hum Genet. 2008;53(7):579-91.              | French Canadian            | Candidate gene approach; likely deleterious variants subsequently genotyped in 73 controls                                               | Sanger sequencing           | HBOC families negative for <i>BRCA1/2</i>                           | 96                                                                                           | 0                            | 0                                                      | N/A                             |                                                                                                 |
| De Nicolo et al Clin Cancer Res. 2008 Jul 15;14(14):4672-80. | Italian                    | Candidate gene approach in BC families                                                                                                   | Sanger sequencing           | HBOC families negative for <i>BRCA1/2</i> and <i>CHEK2</i> 1100delC | 49                                                                                           | 1 LOF                        | 0                                                      | N/A                             |                                                                                                 |

|                                                                                                   |                                                                                                     |                                                                                                                   |                                                  |                                                                                                                     |                                                                                       |                   |       |   |                                              |
|---------------------------------------------------------------------------------------------------|-----------------------------------------------------------------------------------------------------|-------------------------------------------------------------------------------------------------------------------|--------------------------------------------------|---------------------------------------------------------------------------------------------------------------------|---------------------------------------------------------------------------------------|-------------------|-------|---|----------------------------------------------|
| Kurian et al J Clin Oncol. 2014 Jul 1;32(19):2001-9.                                              | USA                                                                                                 | Multi-gene panel testing of 42 genes                                                                              | Agilent SureSelect, MiSeq                        | HBOC cases (NCCN guidelines)                                                                                        | 198 HBOC cases including 174 BC cases, of whom 141 tested negative for <i>BRCA1/2</i> | 0 LOF, 8 missense | 0     |   | N/A                                          |
| Castéra et al Eur J Hum Genet. 2014 Nov;22(11):1305-13.                                           | French                                                                                              | Multi-gene panel testing ; 3 different capture design (16 genes, 21 genes, 27 genes) , all including <i>BRIP1</i> | Agilent SureSelect, Illumina GAllx               | Consecutive HBOC cases referred to Cancer Genetics Clinics for <i>BRCA1/2</i> testing                               | 708                                                                                   | 0                 | 0     |   | N/A                                          |
| Li et al J Med Genet. 2015 Nov 3. pii: jmedgenet-2015-103452. doi: 10.1136/jmedgenet-2015-103452. | Australian                                                                                          | Multi-gene panel testing of 17 genes; potentially relevant variants genotyped in other family members.            | Agilent Target Enrichment kit, Axeq technologies | 660 cases from multiple-case BC families (KConFab)                                                                  | 660                                                                                   | 9 LOF, 7 missense | -     | - | RR 0.47 (95%CI 0.15-1.18) ; HR>1.56 excluded |
| Aloraifi et al <b>Cancer Genet.</b> 2015 Sep;208(9):455-63.                                       | Multi-ethnic: 10 mutation screening studies on <i>BRIP1</i> ; only 2 studies detected LOF variants. | Meta-analysis on 6 genes performed on studies with high-risk BC cases with matched controls                       | DHPLC, CSGE, Sanger sequencing                   | Early onset (<50 yo) or familial BC cases                                                                           | 1,287                                                                                 | 10                | 2,174 | 2 |                                              |
| Hirotsu et al Mol Genet Genomic Med. 2015 Sep;3(5):459-66.                                        | Japanese                                                                                            | Multi-gene panel testing of 25 DNA repair genes                                                                   | Ion AmpliSeq, Ion Proton, Life Technologies      | 155 breast or ovarian cancer cases (94% with family history of BC), including 144 cases negative for <i>BRCA1/2</i> | 144                                                                                   | 0                 | 0     |   | N/A                                          |
| Rajkumar et al Asian Pac J Cancer Prev. 2015;16(13):5211-7.                                       | Indian                                                                                              | Multi-gene panel testing of 30 genes                                                                              | TruSeq Enrichment kit, Illumina HiScan SQ        | Family history of BC or early onset cases (<35 yo)                                                                  | 91                                                                                    | 0                 | 0     |   | N/A                                          |
| Lincoln et al . J Mol Diagn. 2015 Sep;17(5):533-44.                                               | USA                                                                                                 | Multi-gene panel testing of 29 genes                                                                              | Agilent SureSelect, MiSeq or HiSeq2500           | HBOC cases (NCCN guidelines)                                                                                        | 735                                                                                   | 1                 | 0     |   | N/A                                          |
| Aloraifi et al FEBS J. 2015 Sep;282(17):3424-37.                                                  | Irish                                                                                               | Multi-gene panel testing of 312 genes.                                                                            | TruSeq Enrichment kit, Illumina HiSeq            | Familal BC cases negative for <i>BRCA1/2</i>                                                                        | 104                                                                                   | 0                 | 101   | 0 |                                              |
| Maxwell et al Genet Med. 2015 Aug;17(8):630-8.                                                    | USA                                                                                                 | Multi-gene panel testing of 22 genes                                                                              | Agilent SureSelect, sequencer?                   | <i>BRCA1/2</i> negative patients with early onset BC (<40 yo)                                                       | 278                                                                                   | 1                 | 0     |   | N/A                                          |

|                                                    |                                                              |                                                   |                                                  |                                                                                                 |                                              |   |   |     |
|----------------------------------------------------|--------------------------------------------------------------|---------------------------------------------------|--------------------------------------------------|-------------------------------------------------------------------------------------------------|----------------------------------------------|---|---|-----|
| Cybulski Cet al Clin Genet. 2015 Oct;88(4):366-70. | Polish                                                       | Whole exome sequencing and evaluation of 12 genes | Agilent SureSelect human exome kit v4, HiSeq2000 | Familial cases negative for <i>BRCA1</i> , <i>CHEK2</i> and <i>NBS1</i> Polish founder mutation | 144                                          | 1 | 0 | N/A |
| Tung et al Cancer. 2015 Jan 1;121(1):25-33.        | Multi-ethnic, Ashkenazi pop.                                 | Multi-gene panel testing of 25 genes              | RainDance Thunderstorm emulsion PCR, HiSeq2500   | Negative <i>BRCA1/2</i> cases tested at Myriad                                                  | 1781 (multi-ethnic pop) + 377 Ashkenazi Jews | 7 | 0 | N/A |
| Couch et al J Clin Oncol. 2015 Feb 1;33(4):304-11. | 12 studies, population from USA, Germany,UK, Finland, Greece | Multi-gene panel testing of 17 genes              | Agilent custom capture, HiSeq                    | TNBC cases unselected for family history of BC or OC                                            | 1,824                                        | 8 | 0 | N/A |
